# Supplementary material for: Sediment transport capacity response to variations in water discharge in pressurized subglacial channels
Source: Copernicus journal article supplement (doi:10.5194/tc-19-2779-2025), 2025-08-04
Supplement: Supplementary file 1 [file tc-19-2779-2025-supplement.pdf]

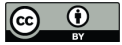

*Supplement of*

## **Sediment transport capacity response to variations in water discharge in pressurized subglacial channels**

**Ian Delaney et al.**

*Correspondence to:* Ian Delaney ([IanArburua.Delaney@unil.ch](mailto:IanArburua.Delaney@unil.ch))

The copyright of individual parts of the supplement might differ from the article licence.

**Table S 1.** As Table 3 but with the fractional exponents stated as rounded decimal numbers. For the subaerial regime the exponents are for displayed for the likely width-exponent  $\alpha = 1$ , as well as its end members 0 (slot canyon) and 1 (only width increases and not depth).

|                              | Width $\times \tau$          | MPM                        | EH                           | Bagnold                                      |
|------------------------------|------------------------------|----------------------------|------------------------------|----------------------------------------------|
|                              | $w \tau$                     | $Q_s \propto w \tau^{3/2}$ | $Q_s \propto w \tau^{5/2}$   | $Q_s \propto w^{-1/2} \Omega^{3/2} H^{-2/3}$ |
| Subaerial ( $\alpha = 0$ )   | $f^{0.7} Q^{0.7} \Psi^{0.7}$ | $f^{0.5} Q \Psi$           | $f^{0.8} Q^{1.7} \Psi^{1.7}$ | $f^{-0.2} Q^{1.1} \Psi^{1.7}$                |
| Subaerial ( $\alpha = 0.3$ ) | $f^{0.7} Q^{0.8} \Psi^{0.7}$ | $f^{0.5} Q \Psi$           | $f^{0.8} Q^{1.3} \Psi^{1.7}$ | $f^{-0.2} Q^{1.0} \Psi^{1.7}$                |
| Subaerial ( $\alpha = 1$ )   | $f^{0.7} Q^{1.0} \Psi^{0.7}$ | $f^{0.5} Q \Psi$           | $f^{0.8} Q^{0.7} \Psi^{1.7}$ | $f^{-0.2} Q^{1.0} \Psi^{1.7}$                |
| R-channel                    | $f^{0.4} Q^{0.8} \Psi^{0.6}$ | $f^{0.5} Q \Psi$           | $f^{0.7} Q^{1.4} \Psi^{1.8}$ | $f^{-0.2} Q^{1.0} \Psi^{1.7}$                |
| Pipe                         | $f Q^2 S^{-1}$               | $f^{1.5} Q^3 S^{-2.5}$     | $f^{2.5} Q^5 S^{-4.5}$       | $f^{1.5} Q^{4.5} S^{-4.7}$                   |

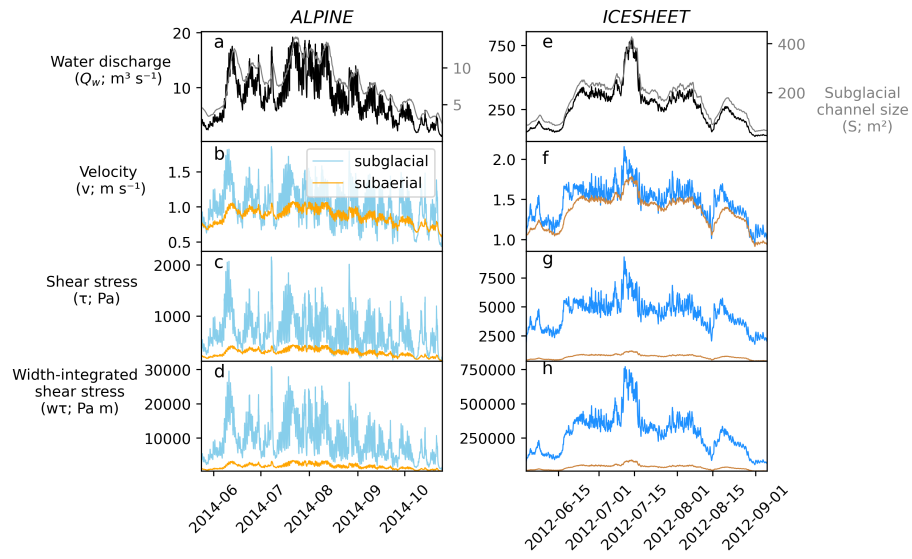

**Figure S 1.** As Figure 2, with 1 hr aggregation.

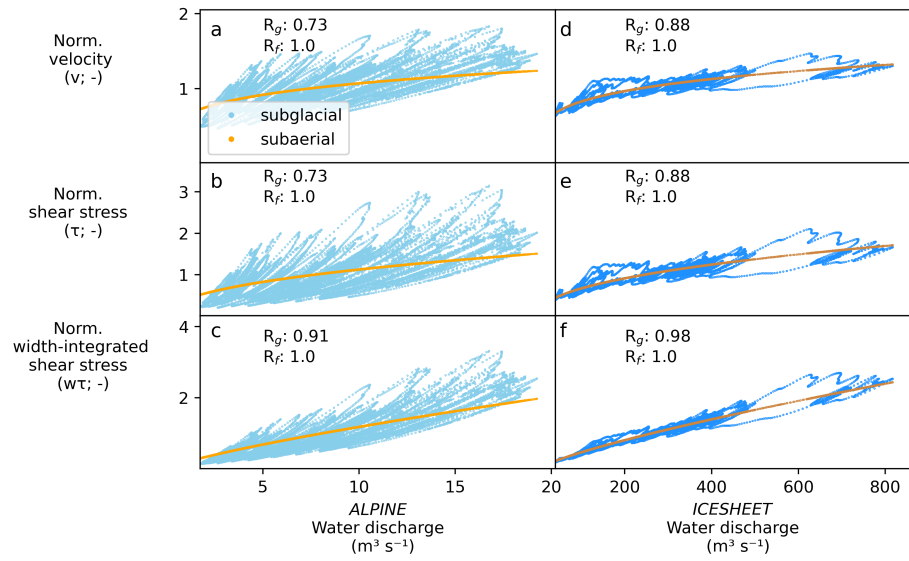

**Figure S 2.** As Figure 3, with 1 hr aggregation.

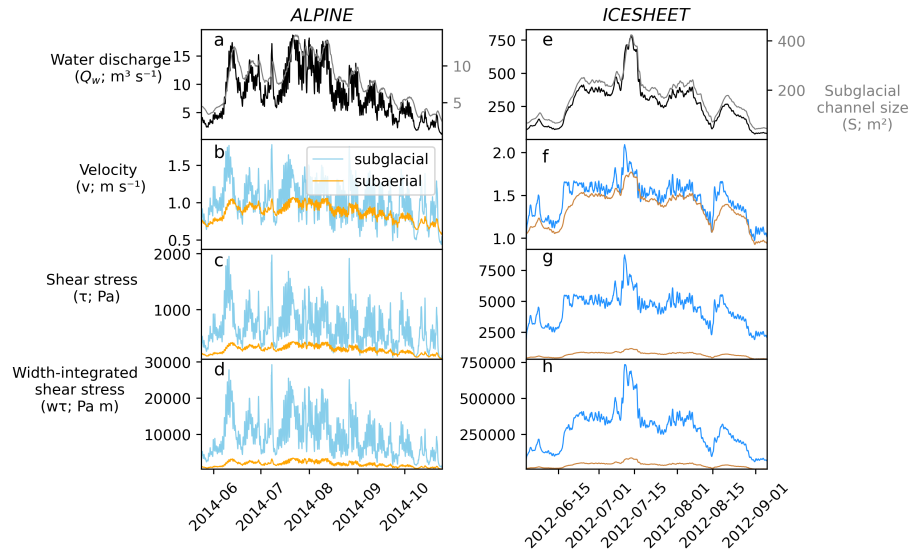

**Figure S 3.** As Figure 2, with 6 hr aggregation.

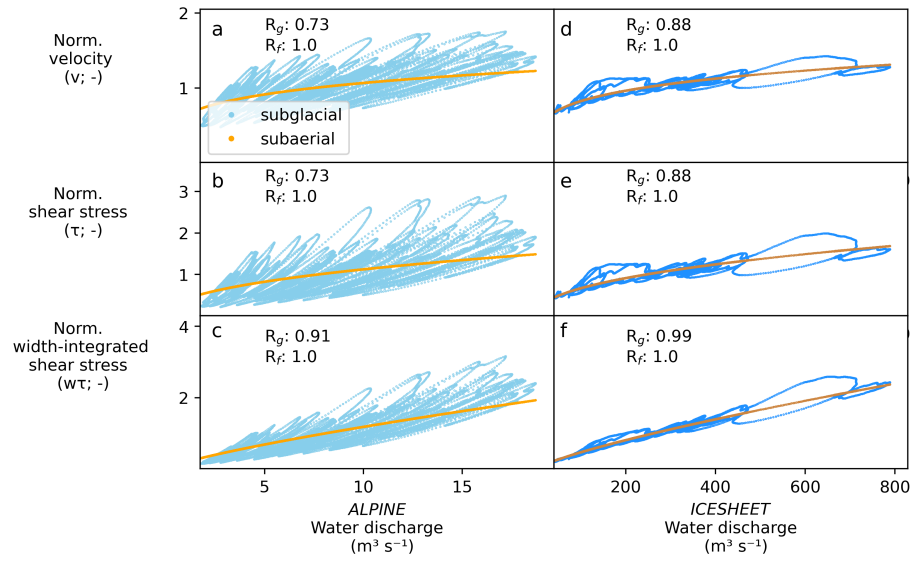

**Figure S 4.** As Figure 3, with 6 hr aggregation.

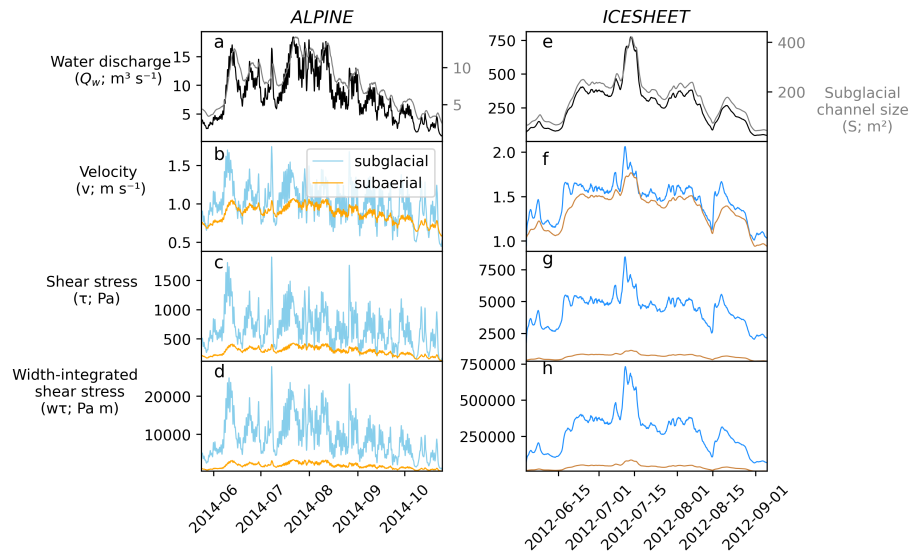

**Figure S 5.** As Figure 2, with 12 hr aggregation.

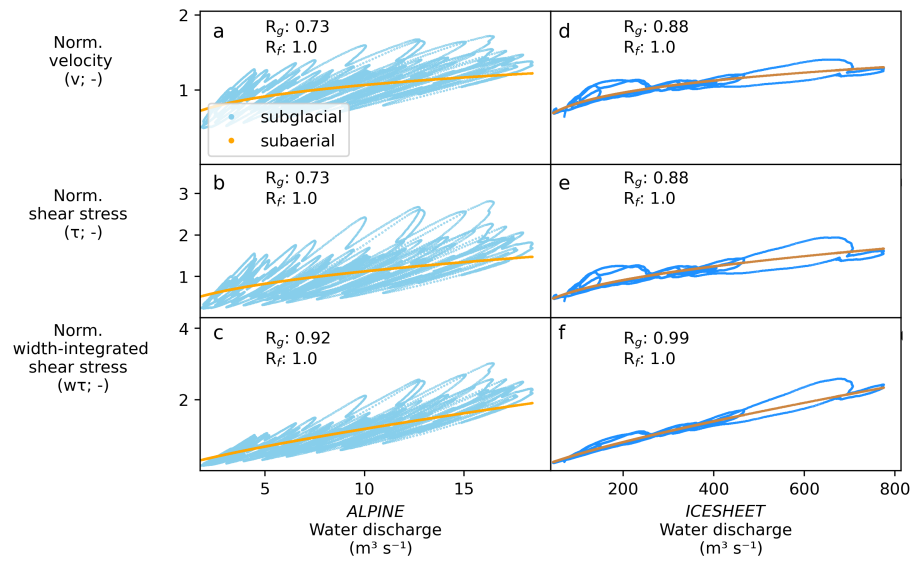

**Figure S 6.** As Figure 3, with 12 hr aggregation.

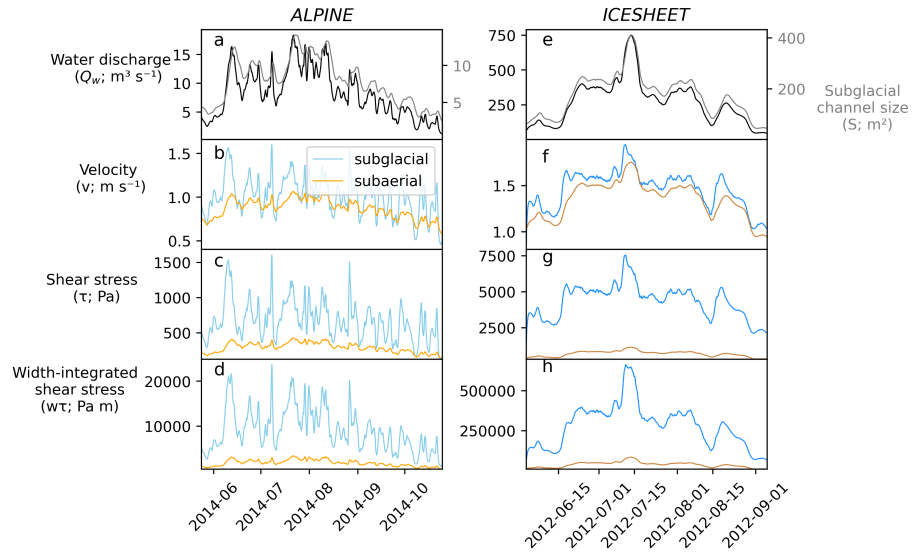

**Figure S 7.** As Figure 2, with 1 day aggregation.

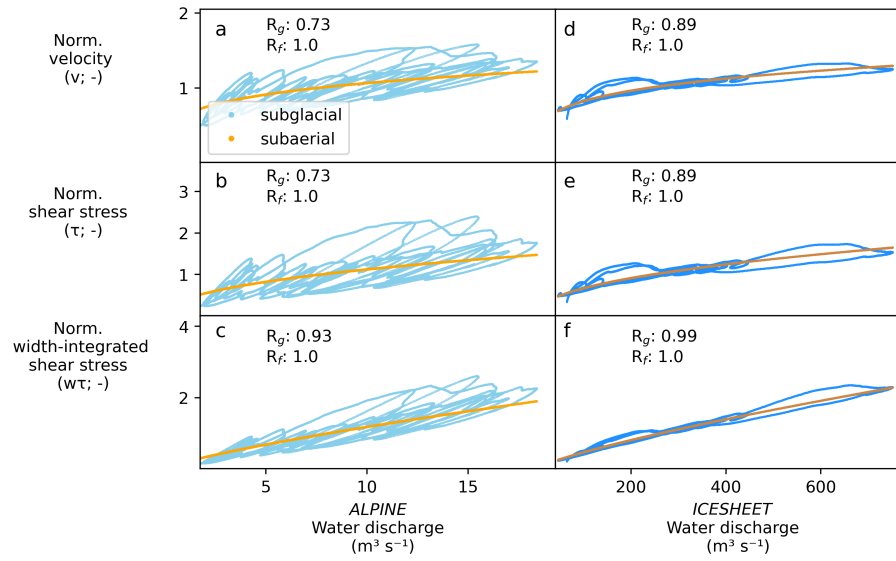

**Figure S 8.** As Figure 3, with 1 day aggregation.

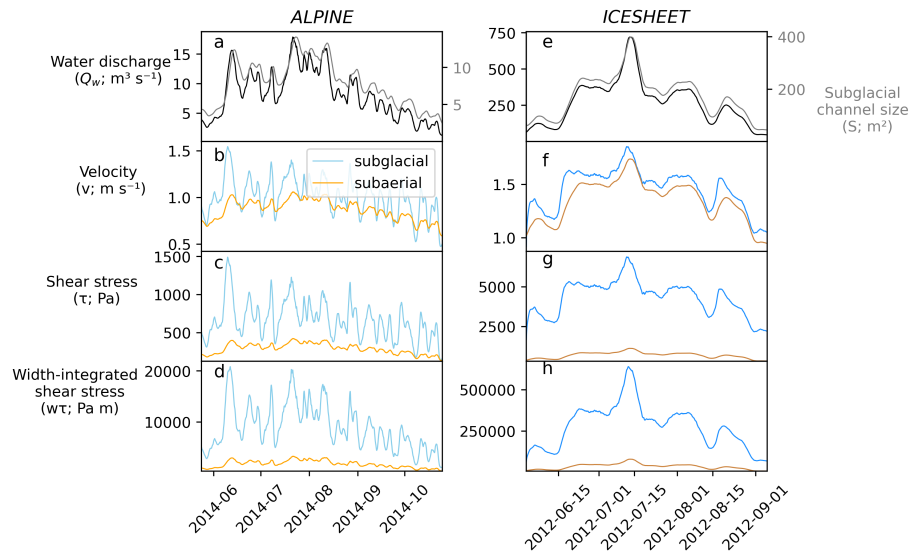

**Figure S 9.** As Figure 2, with 2 day aggregation.

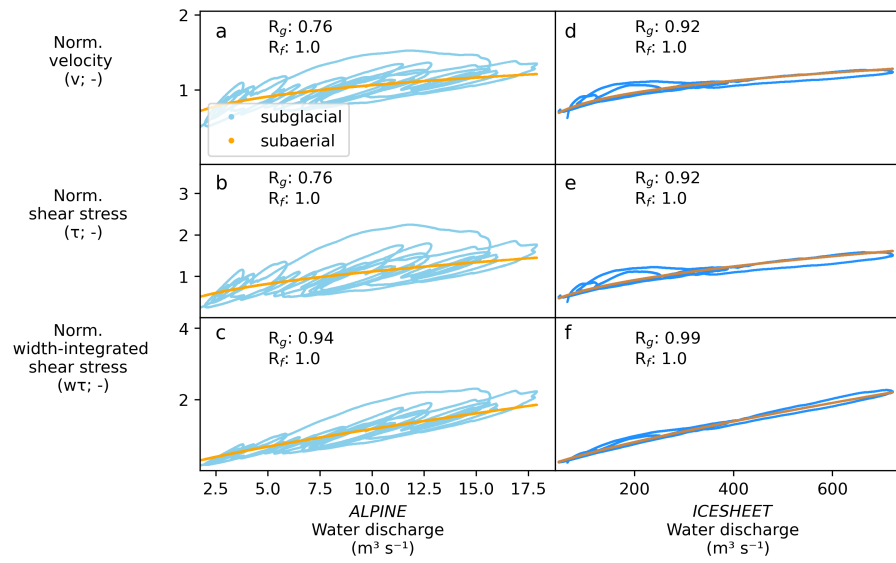

**Figure S 10.** As Figure 3, with 2 day aggregation.

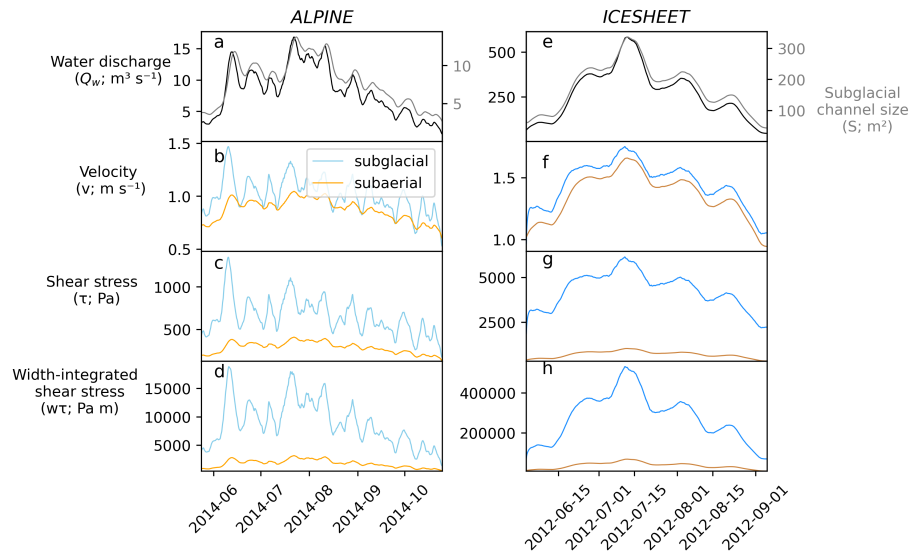

**Figure S 11.** As Figure 2, with 5 day aggregation.

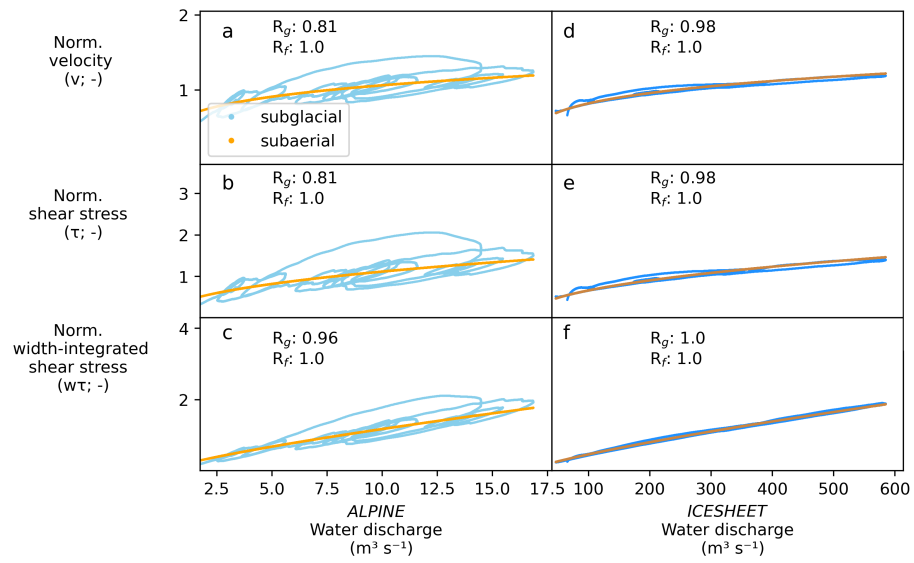

**Figure S 12.** As Figure 3, with 5 day aggregation.



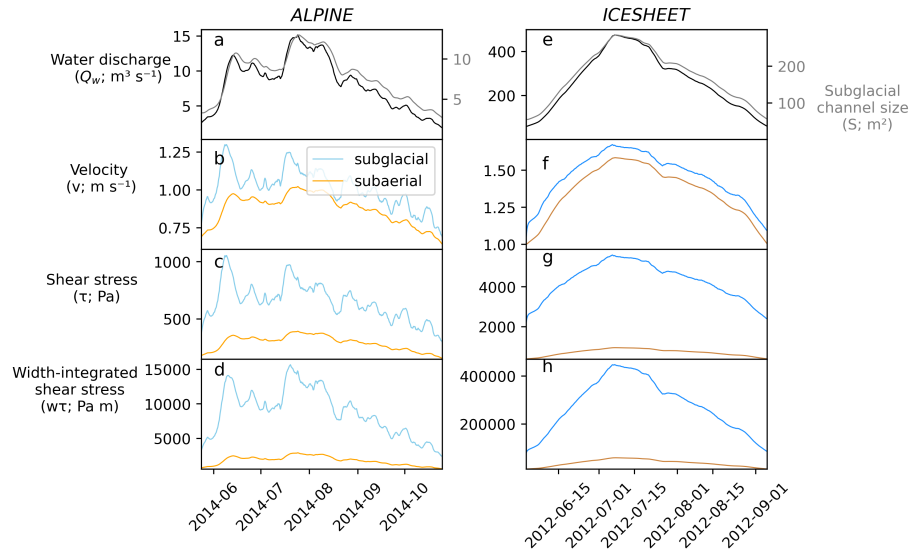

**Figure S 13.** As Figure 2, with 10 day aggregation.

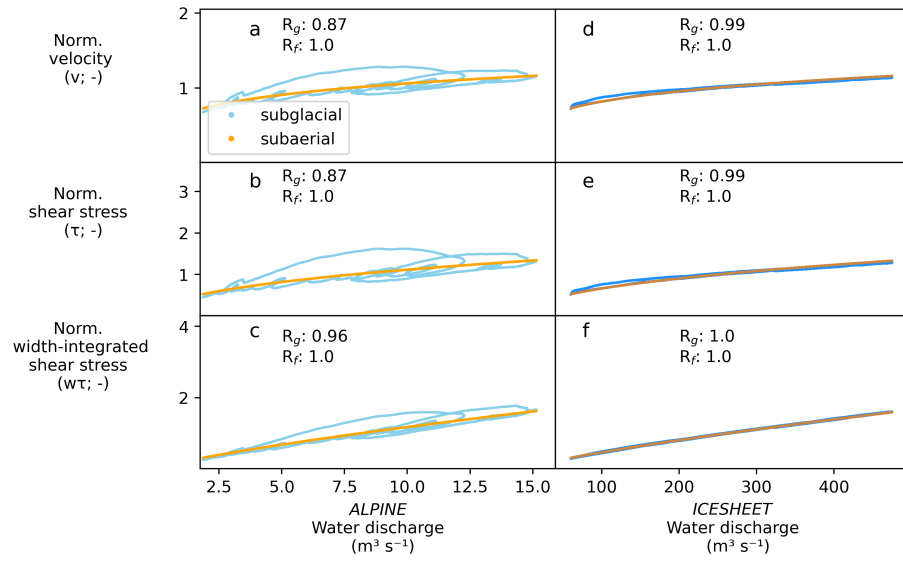

**Figure S 14.** As Figure 3, with 10 day aggregation.

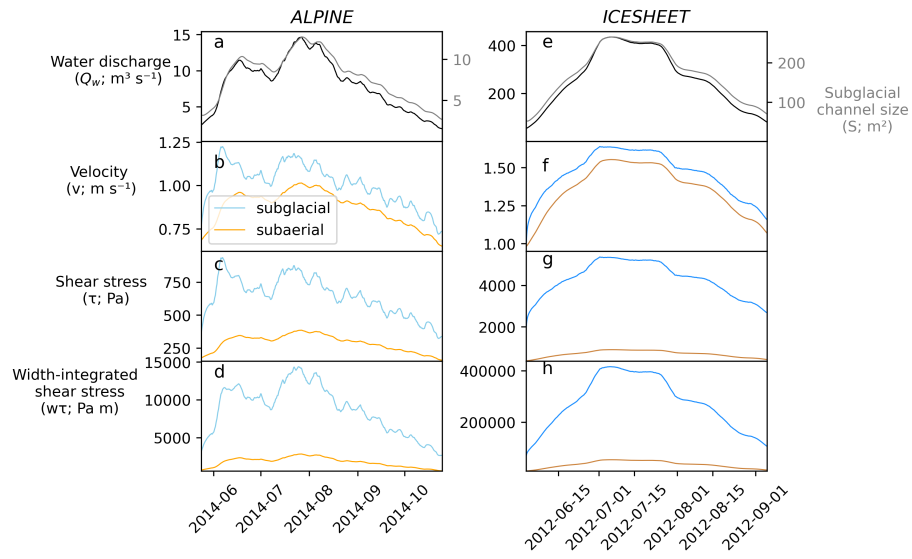

**Figure S 15.** As Figure 2, with 15 day aggregation.

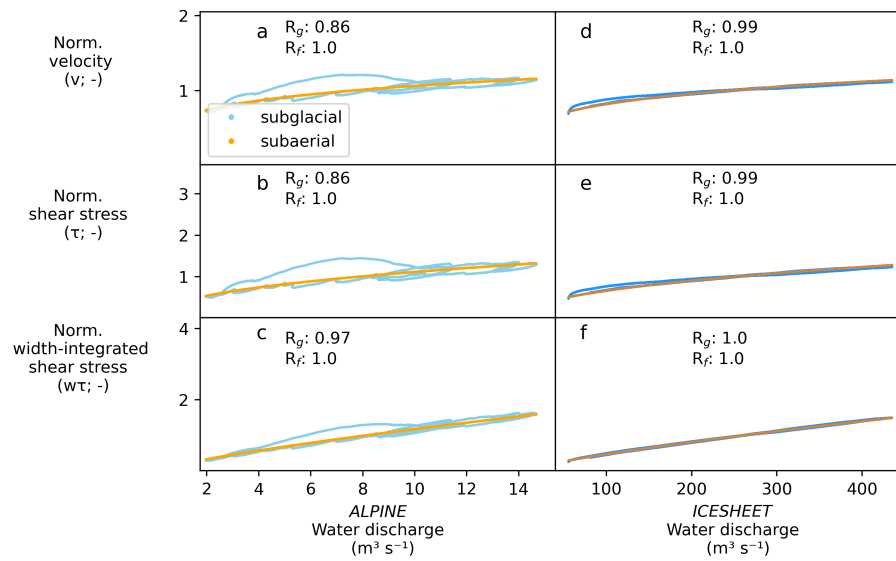

**Figure S 16.** As Figure 3, with 15 day aggregation.
